# Supplementary material for: S-MGBs bearing amidine tail groups are potent, selective antiplasmodial agents
Source: Royal Society of Chemistry journal article supplement (doi:10.1039/d4md00619d), 2024-10-16
Supplement: d4md00619d1.pdf [file d4md00619d1.pdf]

# S-MGBs bearing amidine tail groups are potent, selective antiplasmodial agents: Supplementary Information

Marina PERIETEANU,<sup>1</sup> Tayner RODRIGUEZ GARZON,<sup>2,3</sup> Leah M. C. MCGEE,<sup>1</sup> Abedawn I. KHALAF,<sup>1</sup> Colin J. SUCKLING,<sup>1</sup> Rebecca BEVERIDGE,<sup>1</sup> Vicky M. AVERY<sup>2,3</sup>, and Fraser J. SCOTT<sup>1\*</sup>

<sup>1</sup>Department of Pure and Applied Chemistry, University of Strathclyde, Glasgow UK

<sup>2</sup>Discovery Biology, Centre for Cellular Phenomics, Griffith University, Nathan, Queensland 4111, Australia

<sup>3</sup>School of Environment & Sciences, Griffith University, Nathan, Queensland, 4111, Australia

\*Email: fraser.j.scott@strath.ac.uk

## Table of Contents

1. S-MGB Structures, page 2
2. Synthesis Details, page 7
  - 2.1 General Methods, page 7
  - 2.2 Synthesis Details for Headgroups, page 7
  - 2.3 General Procedure for Novel S-MGBs, page 8
  - 2.4 Characterisation Data for Novel S-MGBs, page 8
3. *In Vitro* Asexual *P. Falciparum* Assays Against 3D7 and Dd2 For S-MGBs, page 16
4. *In Vitro* Cytotoxicity Assessment Against HEK293 For S-MGBs, page 20
5. *In Vitro* Asexual *P. Falciparum* Assays Against 3D7 and Dd2, And Cytotoxicity Assessment Against HEK293 For Control Compounds, page 23
6. Native Mass Spectrometry, page 24



## 1. S-MGB Structures

S-MGB ID

Structure

365

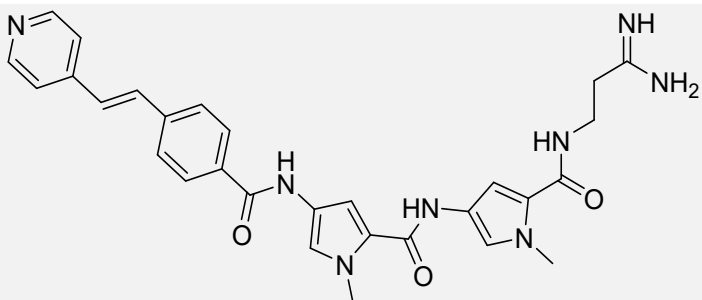

368

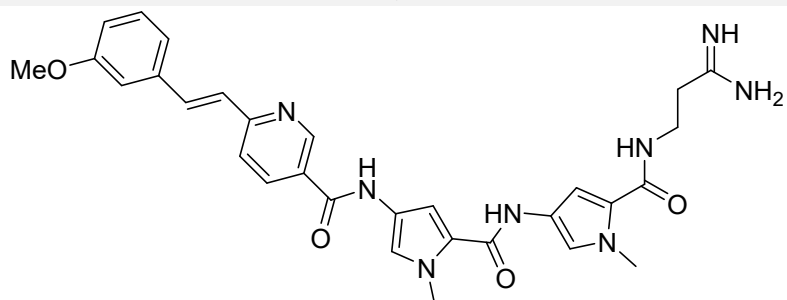

359

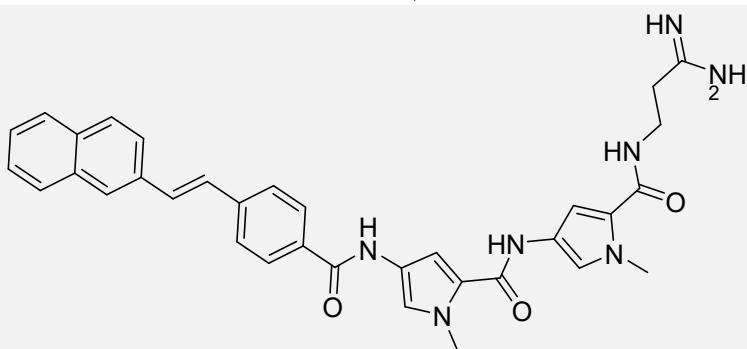

337<sup>b</sup>

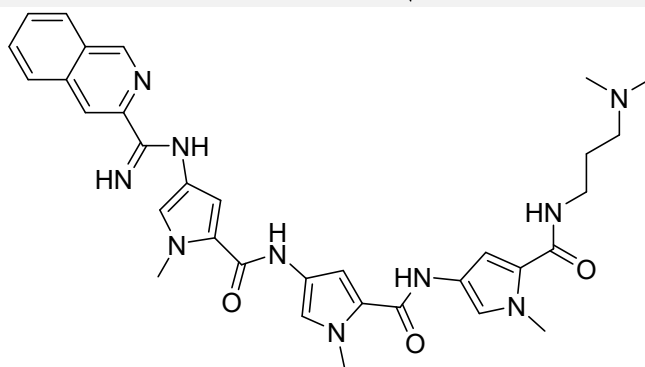

188<sup>c</sup>

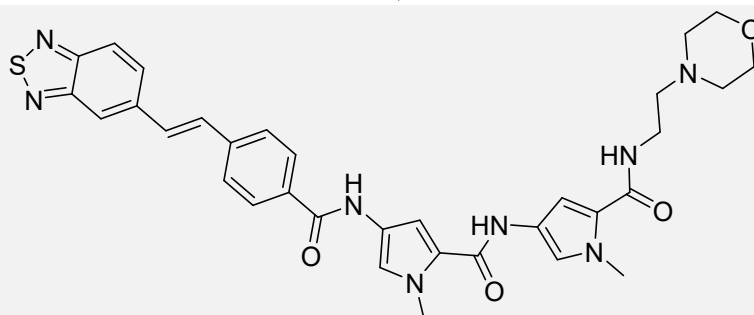



380<sup>d</sup>

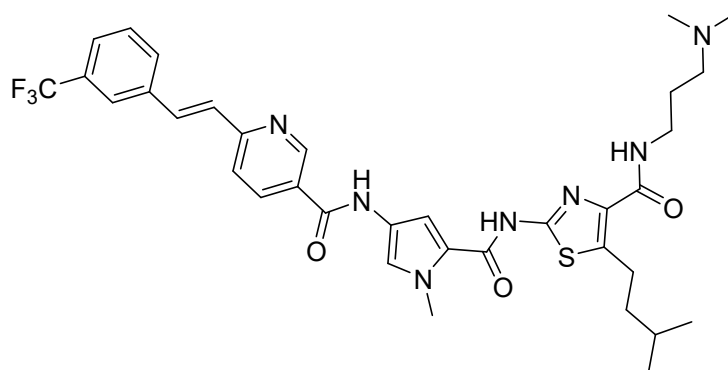

388

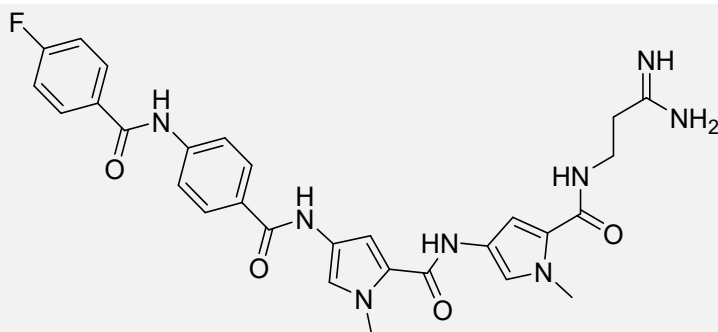

131<sup>e</sup>

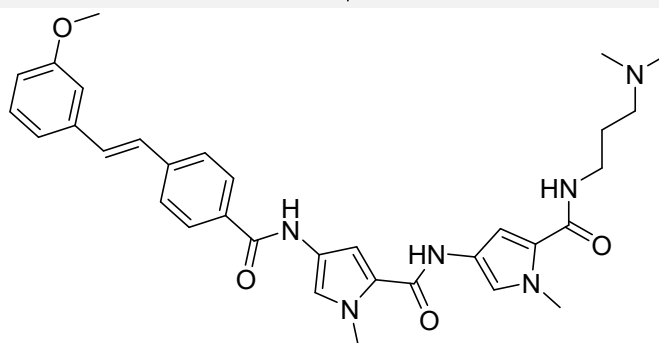

248<sup>a</sup>

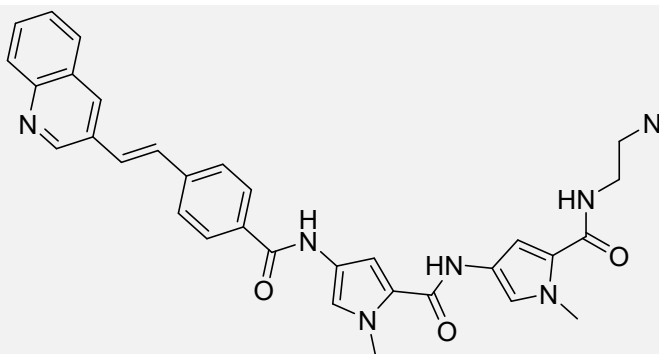

247<sup>a</sup>

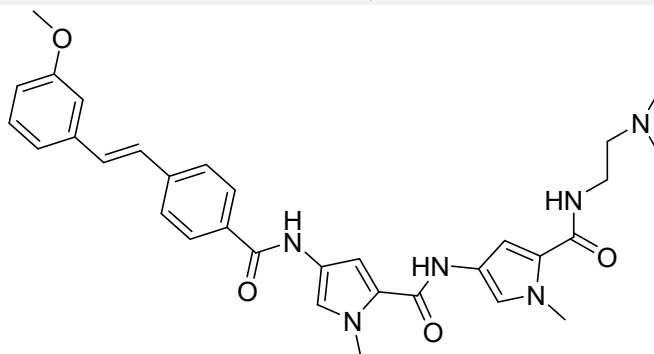



246<sup>a</sup>

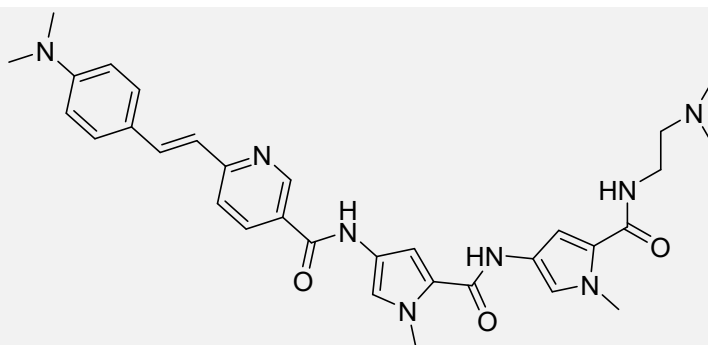

379<sup>d</sup>

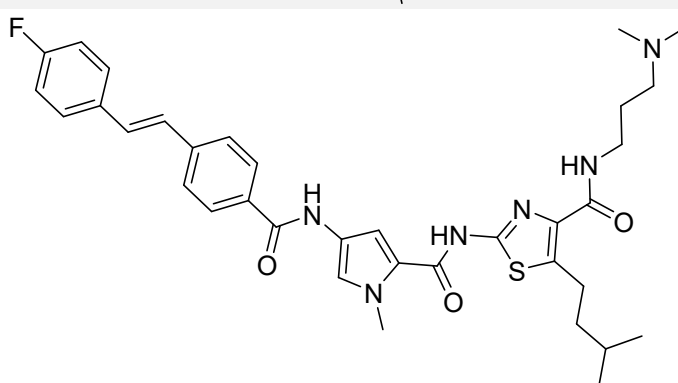

386<sup>d</sup>

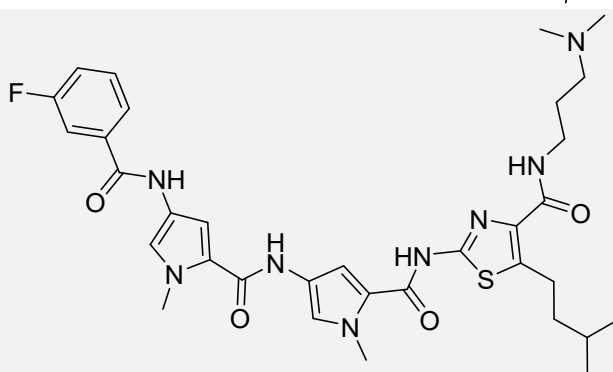

378<sup>d</sup>

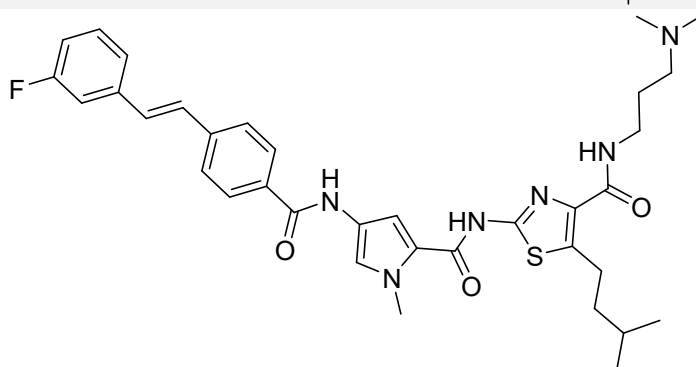

376<sup>d</sup>

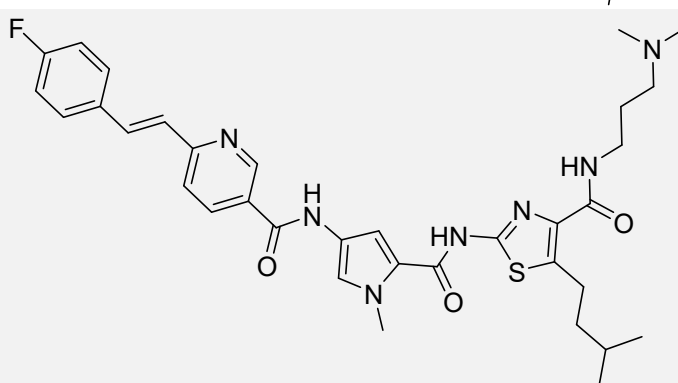



377<sup>d</sup>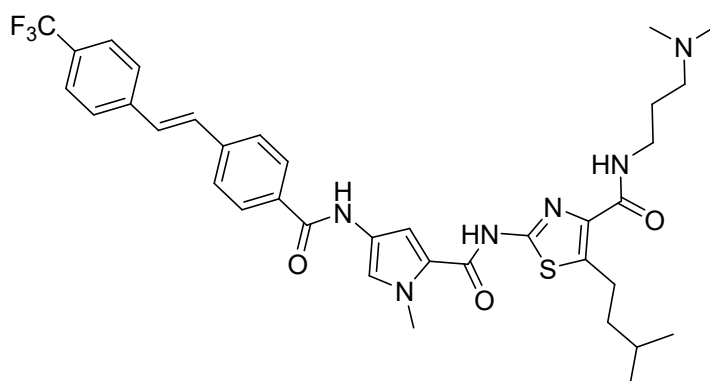

361

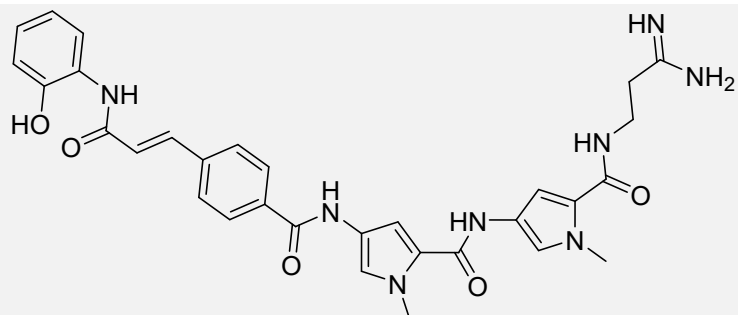367<sup>f</sup>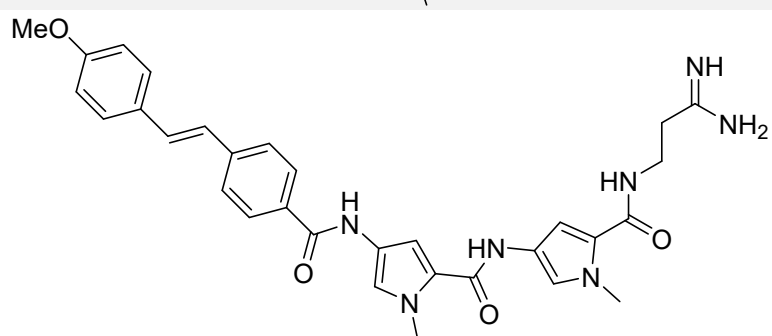390<sup>f</sup>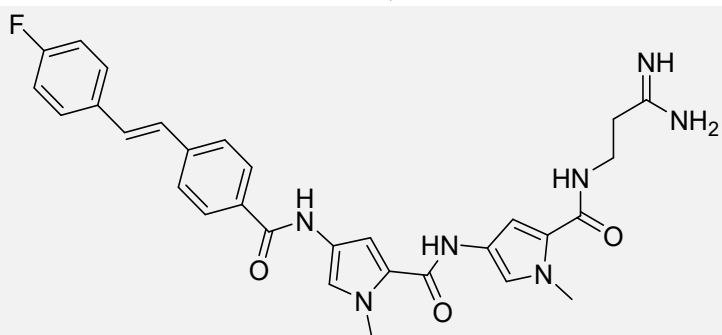192<sup>g</sup>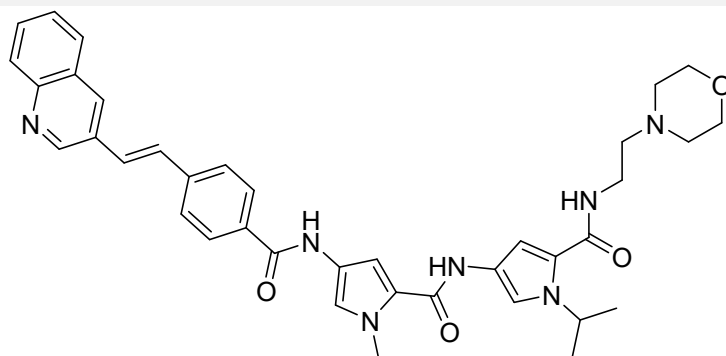



176<sup>c</sup>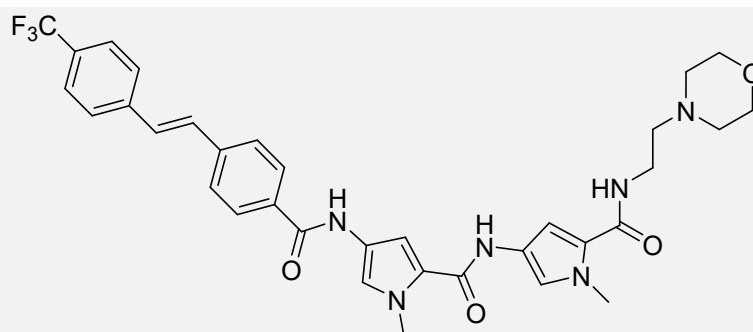391<sup>f</sup>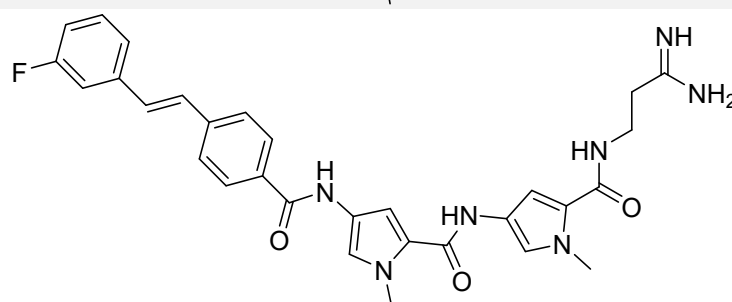330<sup>b</sup>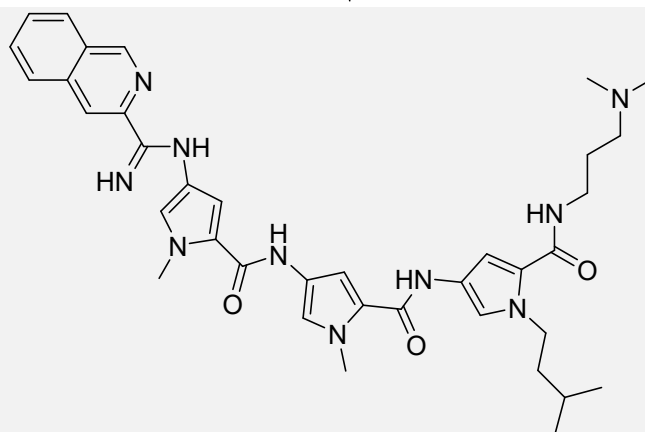389<sup>f</sup>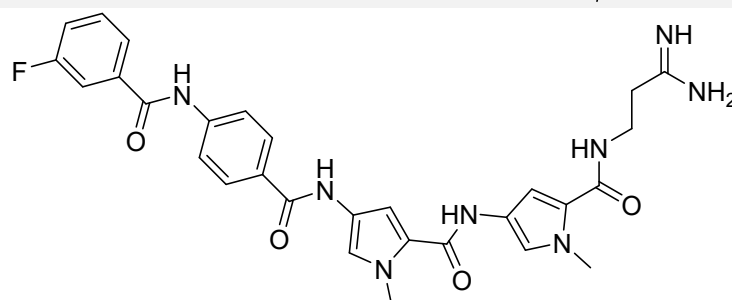245<sup>c</sup>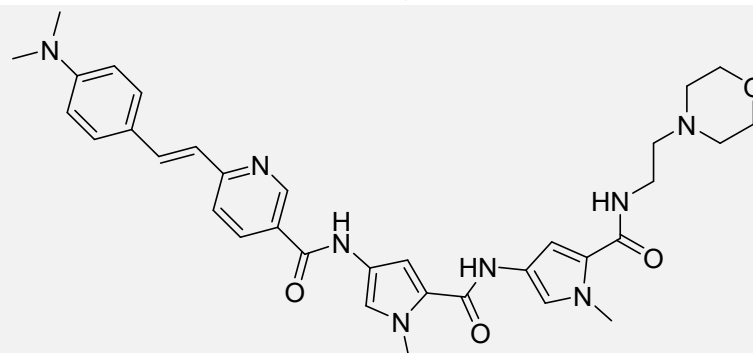

**Table S1.** S-MGB Structures. Compounds isolated as TFA salts. Subscripts indicate location synthesis details of these compounds: <sup>a</sup><https://doi.org/10.1021/acs.jmedchem.8b01847> <sup>b</sup><https://doi.org/10.1016/j.ejmech.2017.05.039> <sup>c</sup><https://doi.org/10.1016/j.ejmech.2016.03.064> <sup>d</sup><https://doi.org/10.1039/C9MD00268E> <sup>e</sup><https://doi.org/10.1021/jm070831g> <sup>f</sup>manuscript submitted <sup>g</sup><https://doi.org/10.1016/j.ejmech.2011.08.035>



## 2. Synthesis Details

### 2.1 General Methods

Reagents and Solvents. Used as supplied from Aldrich unless dry DCM or dry THF. These were provided by standard operating procedures for InnovativeTechnology Solvent Purification System.

Solvent Removal. This was carried out by evaporation using a rotary evaporator at reduced pressure (*ca* 20 mmHg) unless otherwise stated.

Thin Layer Chromatography. TLC was carried out using pre-coated silica plates (Alugram® Sil G/UV<sub>254</sub>). Visualisation of TLC plates was achieved by UV (254 nm).

Melting Point. Reichert hot stage melting point apparatus and are uncorrected.

NMR. Bruker Spectrospin 400 MHz or 500 MHz operating frequency for <sup>1</sup>H NMR nuclei.  $\delta$  quoted in ppm and measured relative to residual proton from the solvent. Coupling constants, *J*, are given in Hz. <sup>13</sup>C NMR run at 125 MHz and measured relative to the solvent.

IR. Mattson 1000 FTIR spectrometer (Unicam Analytical Systems). Spectrum software. Frequencies are quoted in cm<sup>-1</sup>.

HR-MS-FAB. Recorded on a Jeol JMS-700 M STATION high resolution magnetic sector spectrometer.

Column Chromatography. Silica gel mesh size 230-400 (40-60 $\mu$ m).

Preparative HPLC. Instrument Setup: Waters 1525 Binary HPLC Pump, Waters 717plus Autosampler, Waters 2487 Dual  $\lambda$  Absorbance Detector. LC Conditions: Column, Luna 5 $\mu$  C18(2) 100A; Dimensions, 60  $\times$  21.1 mm; Injection Volume, 100  $\mu$ L; Solvent Flow Rate, 6 mL/min; Detection wavelength, 254 nm; solvent A, water (with 0.1% TFA) and solvent B, MeCN (with 0.1% TFA), with run-to-to changes in gradient to achieve separation.

### 2.2 Synthesis Details for Headgroups 3a-e

**3a** As per <https://doi.org/10.1021/jm070831g>

**3c** As per <https://doi.org/10.1021/jm070831g>

**3d** As per <https://doi.org/10.1016/j.ejmech.2020.112411>

**3e** As per <https://doi.org/10.1021/jm070831g>

*Procedure for the Preparation of 3b*

#### **Methyl 6-[(*E*)-2-(3-methoxyphenyl)ethenyl]nicotinate**

3-Methoxybenzaldehyde (210 mg, 1.52 mmol), methyl 6-methylnicotinate (230 mg, 1.52 mmol), acetic anhydride (310 mg, 3.04 mmol) and catalytic amount of zinc chloride were heated at 140°C with stirring for 12 h. Ethyl acetate and brine were added to the cooled reaction mixture and the product was extracted. The organic layer was collected, dried (MgSO<sub>4</sub>) and the solvent removed under reduced pressure. The crude product was applied to a silica gel column and the product was eluted with ethyl acetate/n-hexane 1:1. Fractions containing the required product were collected and the solvents removed under reduced pressure to give the desired material as a yellow solid (87 mg, 21%), mp170- 173°C.

IR (cm<sup>-1</sup>).1717, 1606, 1591, 1511, 1433, 1290, 1254, 1175, 1111, 1020, 844, 818, 760, 734



$^1\text{H}$  NMR (500 MHz, DMSO- $d_6$ )  $\delta$  (ppm) 9.04 (1H, d,  $J = 2.0\text{Hz}$ ), 8.25 (1H, dd,  $J = 2.2\text{Hz}$ ,  $J = 8.2\text{Hz}$ ), 7.81 (1H, d,  $J = 16.0\text{Hz}$ ), 7.67-7.62 (3H, m), 7.28 (1H, d,  $J = 16.0\text{Hz}$ ), 7.00 (2H, d,  $J = 8.8\text{Hz}$ ), 3.88 (3H, s), 3.80 (3H, s).

HRMS  $m/z$  calculated for  $\text{C}_{16}\text{H}_{16}\text{O}_3\text{N}$  270.1130  $[\text{M}+\text{H}]^+$ , found 270.1127  $[\text{M}+\text{H}]^+$

### 6-[(*E*)-2-(3-Methoxyphenyl)ethenyl]nicotinic acid, 3b

Methyl 6-[(*E*)-2-(3-methoxyphenyl)ethenyl]nicotinate (80 mg, 0.297 mmol) was dissolved in methanol (5 mL) to which sodium hydroxide solution (145 mg) in water (10 mL) was added. The reaction mixture was heated under reflux for 3 h. Methanol was removed under reduced pressure and the remaining solution was cooled to  $0^\circ\text{C}$ . Hydrochloric acid (conc.) was added dropwise with vigorous stirring until pH 4. The yellow solid material was collected by filtration, washed with water and dried under reduced pressure at  $50^\circ\text{C}$  to give the required material (59 mg, 78%), mp  $230\text{--}233^\circ\text{C}$

IR ( $\text{cm}^{-1}$ ) 1717, 1681, 1635, 1595, 1513, 1292, 1250, 1173, 1023, 825

$^1\text{H}$  NMR (500 MHz, DMSO- $d_6$ )  $\delta$  (ppm) 9.03 (1H, d,  $J = 2.0\text{Hz}$ ), 8.29 (1H, dd,  $J = 2.1\text{Hz}$ ,  $J = 8.2\text{Hz}$ ), 7.90-7.65 (4H, m), 7.29 (1H, d,  $J = 16.0\text{Hz}$ ), 7.01 (2H, m), 3.80 (3H, s)

HRMS  $m/z$  calculated for  $\text{C}_{15}\text{H}_{14}\text{O}_3\text{N}$  256.0974  $[\text{M}+\text{H}]^+$ , found 256.0972  $[\text{M}+\text{H}]^+$

### 2.3 General Procedure for Novel S-MGBs

Nitro tail group dimer **1**, (prepared as per <https://doi.org/10.1021/acs.jmedchem.8b01847>) (50 mg, 0.123 mmol) was dissolved in methanol (10 mL) to which Pd/C-10% (40 mg) was added at  $0^\circ\text{C}$  under nitrogen with stirring. The reaction mixture was hydrogenated for 4h at room temperature and atmospheric pressure. The catalyst was removed over Kieselguhr and the solvent was removed under reduced pressure. The amine so formed was taken forward directly without further purification. Amide coupling of the amine with the appropriate head group acid (**3a-3e**) (0.123 mmol) was carried out in the presence of HBTU (0.17 mmol) in DMF (2 mL) and triethylamine (0.17 mmol), for 18 hours at room temperature. The reaction mixture was then purified directly by HPLC, followed by freeze drying, to afford the final S-MGB compounds as their TFA salts.

### 2.4 Characterisation Details for Novel S-MGBs

**S-MGB-365, 4a**, (*E*)-4-(4-((5-((3-amino-3-iminiopropyl)carbamoyl)-1-methyl-1H-pyrrol-3-yl)carbamoyl)styryl)pyridin-1-ium di-trifluoroacetate

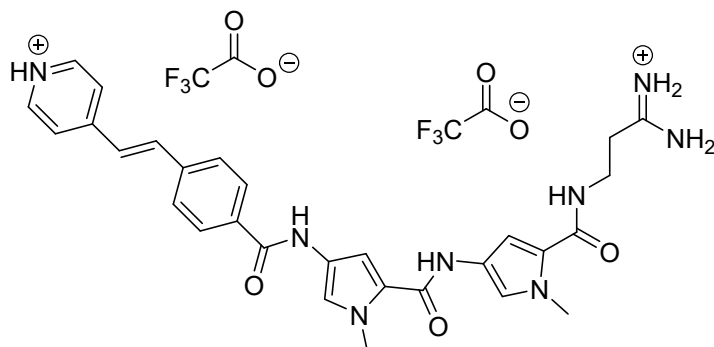

Yellow solid (17% yield) with no distinct melting point.

IR: 721, 748, 801, 841, 974, 1126, 1196, 1269, 1310, 1404, 1437, 1468, 1516, 1570, 1622, 1676  $\text{cm}^{-1}$



HRMS: Found: M+2/2: 270.1294 Calculated for C<sub>29</sub>H<sub>32</sub>O<sub>3</sub>N<sub>8</sub> 270.1293

[illegible]

IR spectrum of compound 10. The x-axis represents the wavenumber in  $\text{cm}^{-1}$  (ranging from 4000 to 750), and the y-axis represents the percentage of transmittance (%T) (ranging from 80 to 100). The spectrum shows several characteristic absorption bands, with the following labeled peaks:

| Wavenumber ( $\text{cm}^{-1}$ ) |
|---------------------------------|
| 1676.14                         |
| 1622.13                         |
| 1570.06                         |
| 1516.05                         |
| 1467.83                         |
| 1436.97                         |
| 1404.18                         |
| 1390.87                         |
| 1289.16                         |
| 1195.87                         |
| 1128.43                         |
| 974.05                          |
| 840.96                          |
| 800.46                          |
| 746.36                          |
| 731.38                          |



**S-MGB-368, 4b, (E)-5-((5-((5-((3-amino-3-iminiopropyl)carbamoyl)-1-methyl-1H-pyrrol-3-yl)carbamoyl)-1-methyl-1H-pyrrol-3-yl)carbamoyl)-2-(3-methoxystyryl)pyridin-1-ium di-trifluoroacetate**

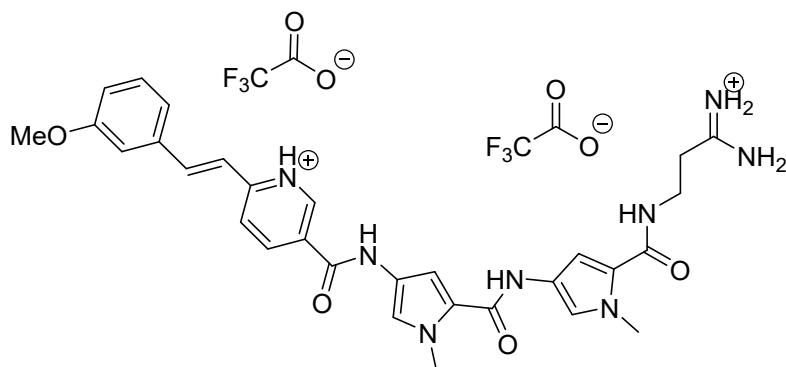

White solid (23% yield) with no distinct melting point.

IR: 720, 775, 799, 833, 961, 1005, 1045, 1126, 1182, 1254, 1290, 1404, 1433, 1462, 1528, 1578, 1630, 1659  $\text{cm}^{-1}$

$^1\text{H}$  NMR ( $\text{DMSO}-d_6$ ): 10.51(1H, s), 9.97(1H, s), 9.10(1H, d,  $J = 2.0\text{Hz}$ ), 8.91(2H, s), 8.48(2H, s), 8.31(1H, dd,  $J = 2.5\text{Hz}$  &  $J = 8.0\text{Hz}$ ), 8.22(1H, t,  $J = 5.5\text{Hz}$ ), 7.79(1H, d,  $J = 16.0\text{Hz}$ , double bond), 7.71(1H, d,  $J = 8.5\text{Hz}$ ), 7.45(1H, d,  $J = 16.0\text{Hz}$ , double bond), 7.37-7.34(4H, m), 7.29(1H, d,  $J = 6.5\text{Hz}$ ), 7.19(1H, d,  $J = 1.5\text{Hz}$ ), 7.121-7.118(1H, d,  $J = 1.5\text{Hz}$ ), 6.97(1H, d,  $J = 1.5\text{Hz}$ ), 6.95(1H, dd,  $J = 1.5\text{Hz}$  &  $J = 8.0\text{Hz}$ ), 3.89(3H, s), 3.83(6H, s), 3.54(2H, q,  $J = 6.5\text{Hz}$ ), 2.63(2H, t,  $J = 6.5\text{Hz}$ ).

HRMS: Found: 569.2622 Calculated for  $\text{C}_{30}\text{H}_{33}\text{O}_4\text{N}_8$  569.2619

**$^1\text{H}$ -NMR Spectrum:**

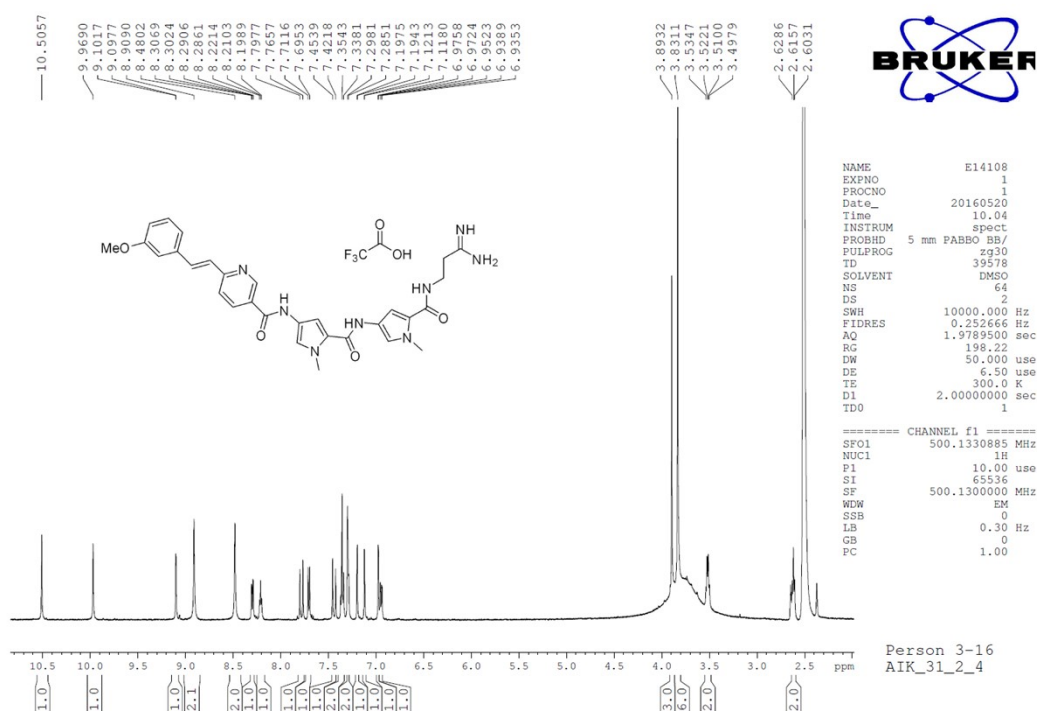



**IR Spectrum:**

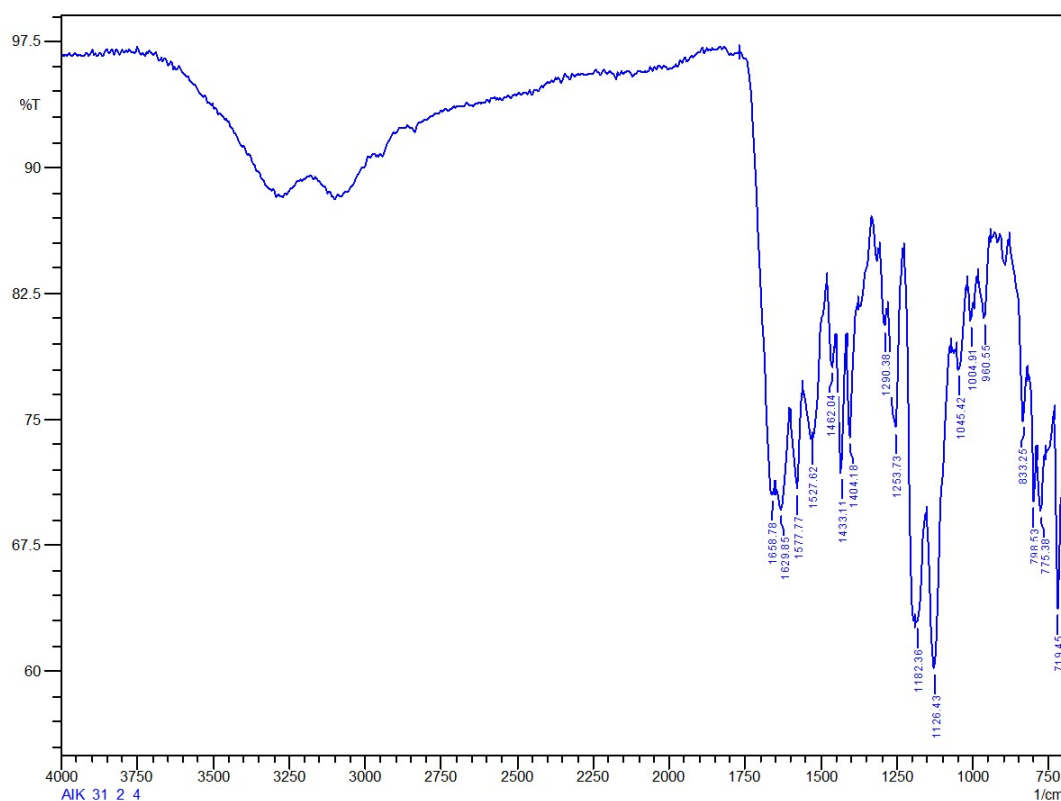

**S-MGB-359, 4c, (E)-1-amino-3-(1-methyl-4-(1-methyl-4-(4-(2-(naphthalen-2-yl)vinyl)benzamido)-1H-pyrrole-2-carboxamido)-1H-pyrrole-2-carboxamido)propan-1-iminium trifluoroacetate**

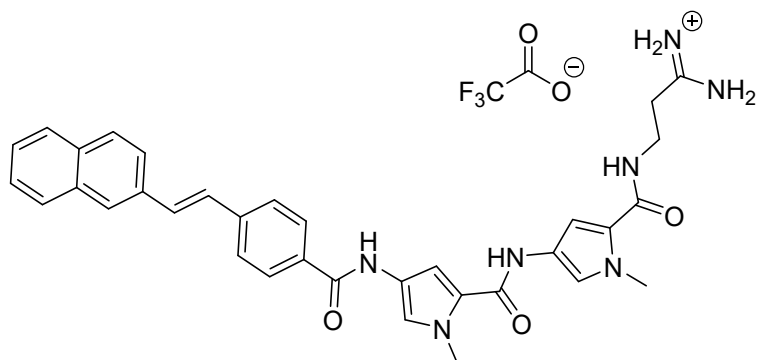

White solid (32% yield) with no distinct melting point.

IR: 720, 743, 801, 833, 895, 959, 1013, 1063, 1128, 1182, 1200, 1265, 1402, 1433, 1464, 1528, 1580, 1636, 1670  $\text{cm}^{-1}$

$^1\text{H}$  NMR ( $\text{DMSO-d}_6$ ): 10.35(1H, s), 9.96(1H, s), 8.91(2H, s), 8.49(2H, s), 8.22(1H, t,  $J = 5.7\text{Hz}$ ), 8.08(1H, s), 8.01(2H, d, 8.3Hz), 7.97-7.92(4H, m), 7.82(2H, d,  $J = 8.3\text{Hz}$ ), 7.61-7.49(4H, m), 7.35(1H, d,  $J = 1.4\text{Hz}$ ), 7.20(1H, d,  $J = 1.4\text{Hz}$ ), 7.13(1H, d,  $J = 1.4\text{Hz}$ ), 6.98(1H, d,  $J = 1.4\text{Hz}$ ), 3.89(3H, s), 3.83(3H, s), 3.54(2H, q,  $J = 6.3\text{Hz}$ ), 2.63(2H, t,  $J = 6.3\text{Hz}$ ).

HRMS: Found: 588.2714 Calculated for  $\text{C}_{34}\text{H}_{34}\text{O}_3\text{N}_7$  588.2718

**$^1\text{H}$ -NMR Spectrum:**







**S-MGB-388, 4d, 1-amino-3-(4-(4-(4-(4-fluorobenzamido)benzamido)-1-methyl-1H-pyrrole-2-carboxamido)-1-methyl-1H-pyrrole-2-carboxamido)propan-1-iminium trifluoroacetate**

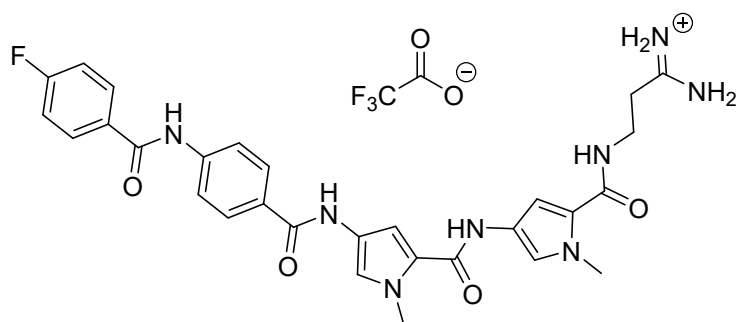

White solid (18% yield) with no distinct melting point.

IR: 719, 758, 798, 848, 898, 1010, 1062, 1126, 1161, 1182, 1199, 1234, 1263, 1290, 1325, 1404, 1435, 1465, 1502, 1527, 1577, 1600, 1629, 1639, ~3050, ~3300  $\text{cm}^{-1}$

$^1\text{H}$  NMR (DMSO- $d_6$ ): 10.50(1H, s), 10.24(1H, s), 9.95(1H, s), 8.90(2H, s), 8.52(2H, s), 8.22(1H, t,  $J = 5.7\text{Hz}$ ), 8.05-8.09(2H, m), 7.97 (2H, d, 8.8Hz), 7.91(2H, d, 8.8Hz), 7.38-7.43(2H, m), 7.32(1H, d,  $J = 1.8\text{Hz}$ ), 7.19(1H, d,  $J = 1.8\text{Hz}$ ), 7.10(1H, d,  $J = 1.8\text{Hz}$ ), 6.97(1H, d,  $J = 1.8\text{Hz}$ ), 3.88(3H, s), 3.83(3H, s), 3.51(2H, q,  $J = 6.3\text{Hz}$ ), 2.61(2H, t,  $J = 6.3\text{Hz}$ ).

HRMS: Found: 573.2375 calculated for  $\text{C}_{29}\text{H}_{30}\text{O}_4\text{N}_8\text{F}$  573.2369

*$^1\text{H}$ -NMR Spectrum:*

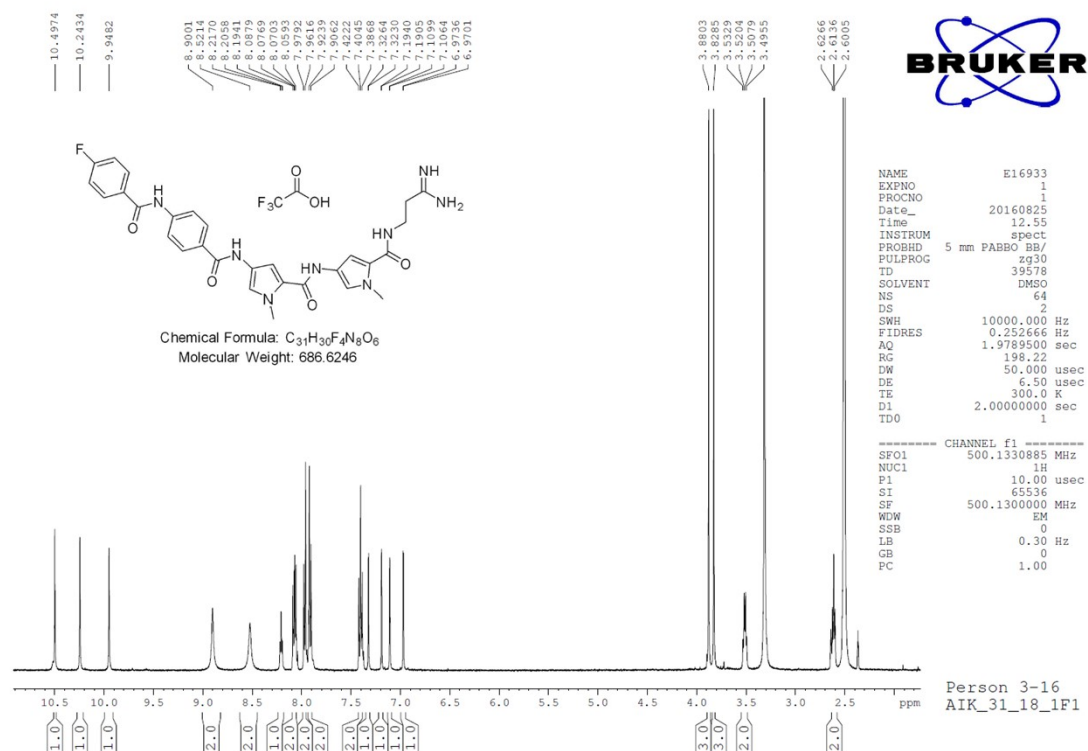

*IR Spectrum:*



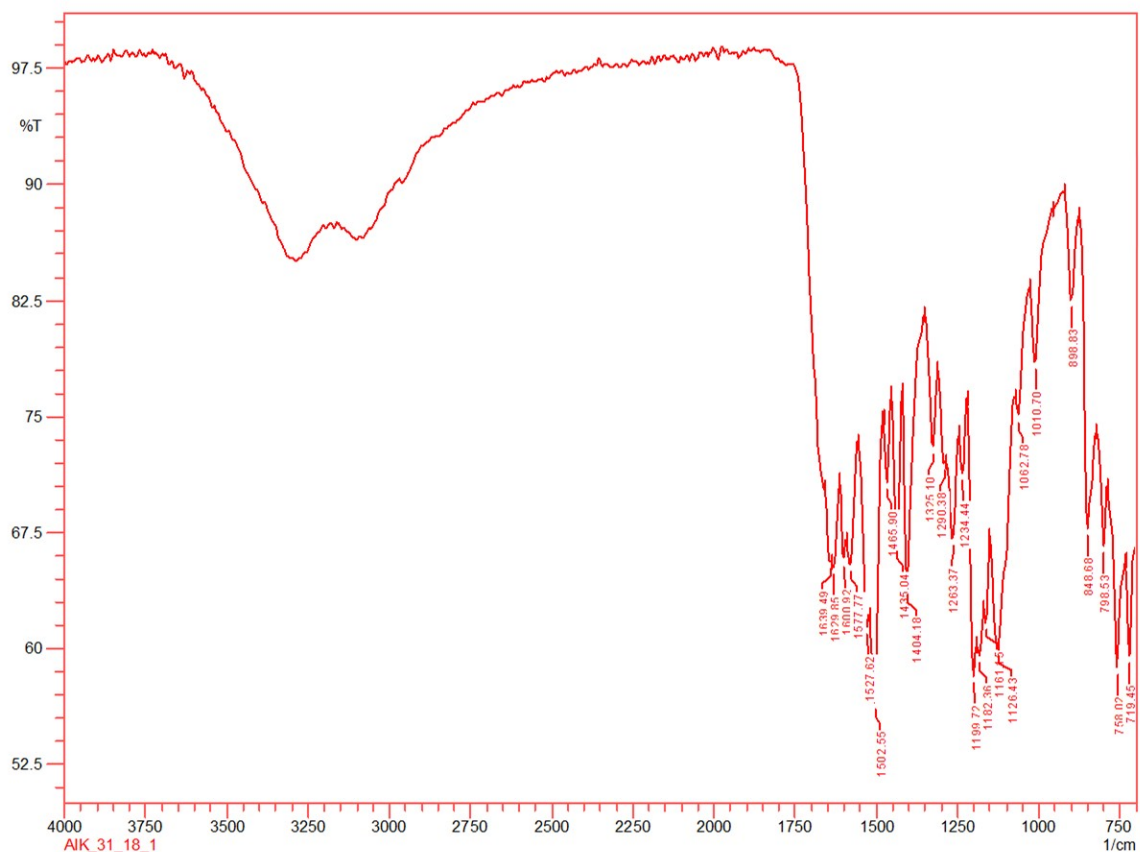

**S-MGB-361, 4e, (E)-1-amino-3-(4-(4-(4-(3-((2-hydroxyphenyl)amino)-3-oxoprop-1-en-1-yl)benzamido)-1-methyl-1H-pyrrole-2-carboxamido)-1-methyl-1H-pyrrole-2-carboxamido)propan-1-iminium trifluoroacetate**

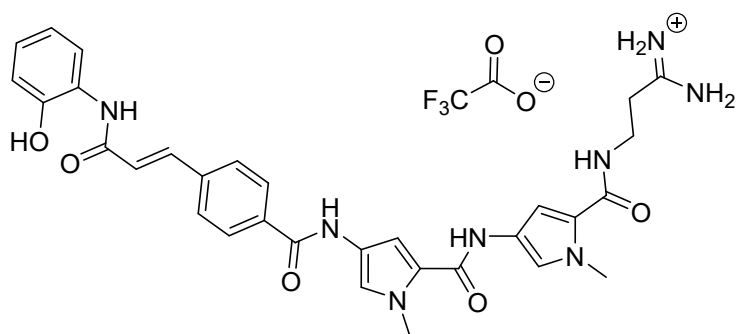

Yellow solid (11% yield) with no distinct melting point.

IR: 721, 748, 799, 837, 976, 999, 1126, 1182, 1200, 1271, 1350, 1404, 1435, 1451, 1526, 1578, 1632, 1655, 1670  $\text{cm}^{-1}$

$^1\text{H}$  NMR ( $\text{DMSO}-d_6$ ): 10.45(1H, s), 10.04(1H, s), 10.02(1H, s), 9.56(1H, s), 8.96(2H, s), 8.54(2H, s), 8.27(1H, t, 5.6Hz), 8.08(3H, m), 7.84(2H, d, 8.2Hz), 7.70(1H, d,  $J = 15.6\text{Hz}$ ), 7.40(1H, t,  $J = 1.3\text{Hz}$ ), 7.39(1H, d,  $J = 9.2\text{Hz}$ ), 7.35(1H, d,  $J = 1.4\text{Hz}$ ), 7.25(1H, d,  $J = 1.4\text{Hz}$ ), 7.05(2H, m), 6.97(1H, d,  $J = 7.0\text{Hz}$ ), 6.89(1H, t,  $J = 7.9\text{Hz}$ ), 3.94(3H, s), 3.88(3H, s), 3.59(2H, q,  $J = 6.5\text{Hz}$ ), 2.68(2H, t,  $J = 6.5\text{Hz}$ ).

HRMS: Found: 597.2567 Calculated for  $\text{C}_{31}\text{H}_{33}\text{O}_5\text{N}_8$  597.2579



*<sup>1</sup>H-NMR Spectrum:*

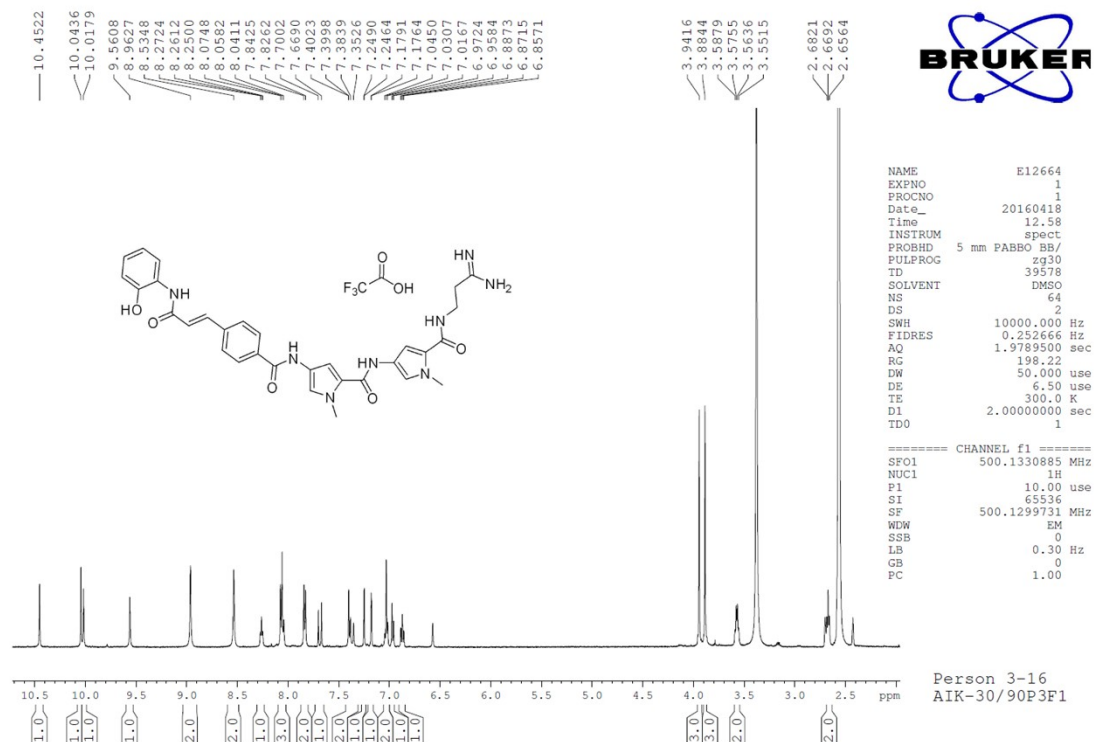

*IR Spectrum:*

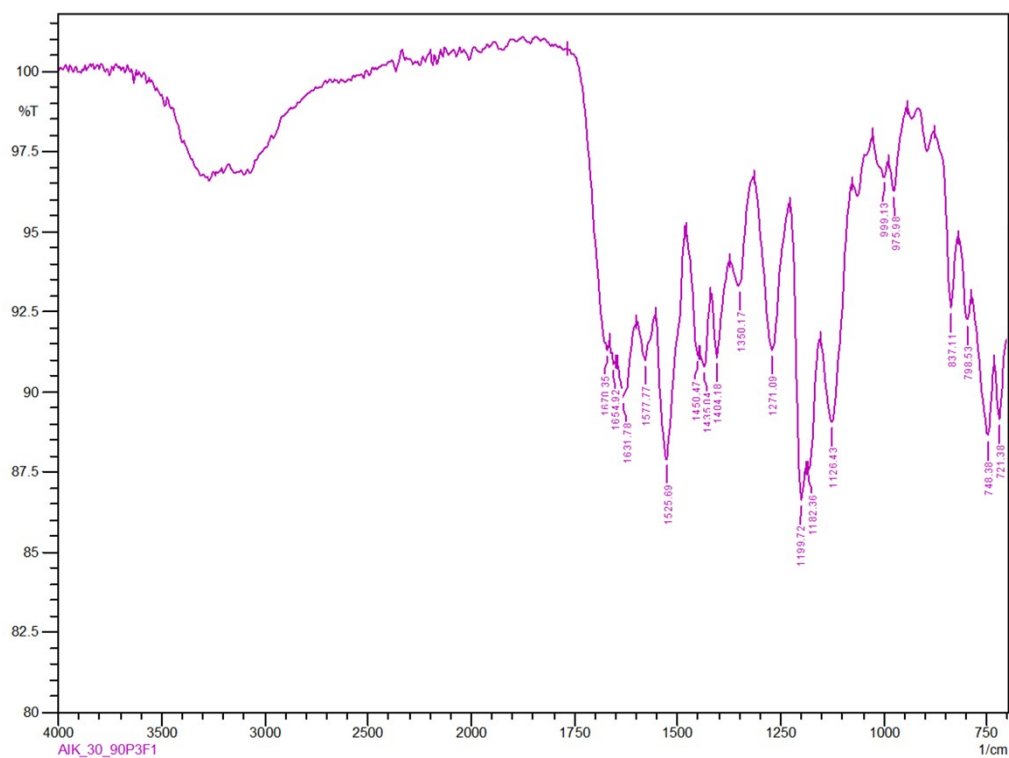



### 3. In Vitro Asexual *P. Falciparum* Assays Against 3D7 and Dd2 For S-MGBs

131

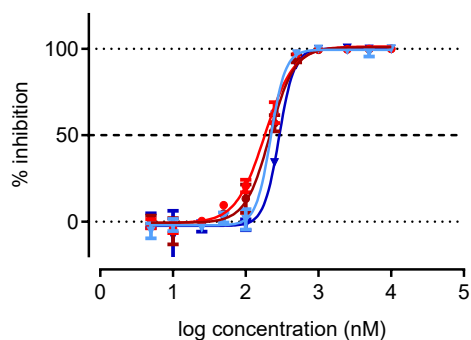

176

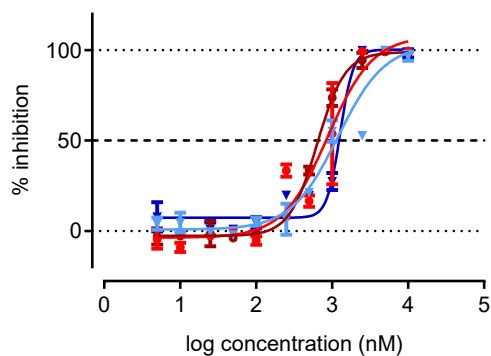

3D7\_A  
3D7\_B  
Dd2\_A  
Dd2\_B

188

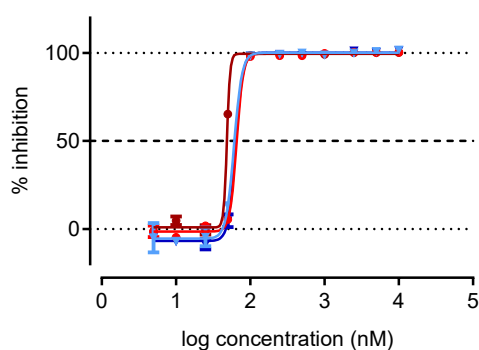

192

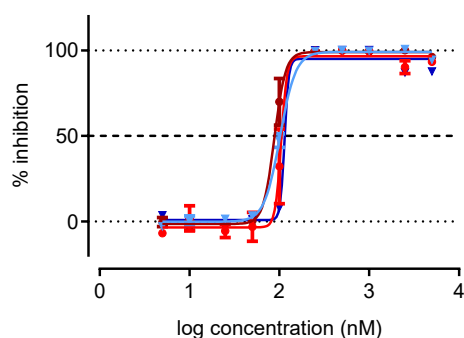

245

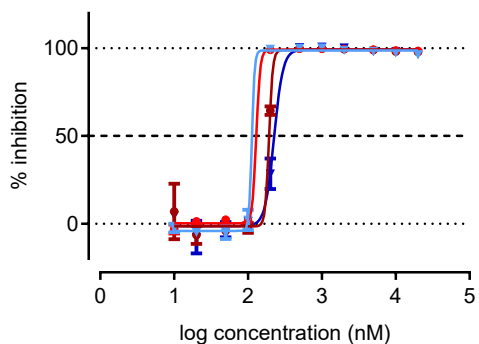

246

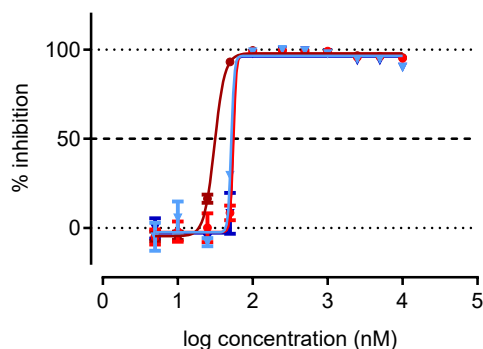

247

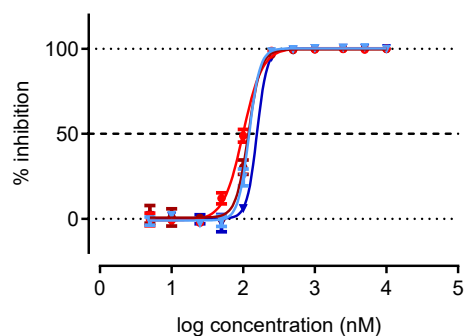

248

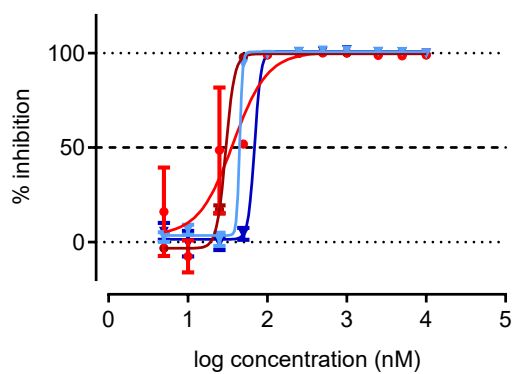



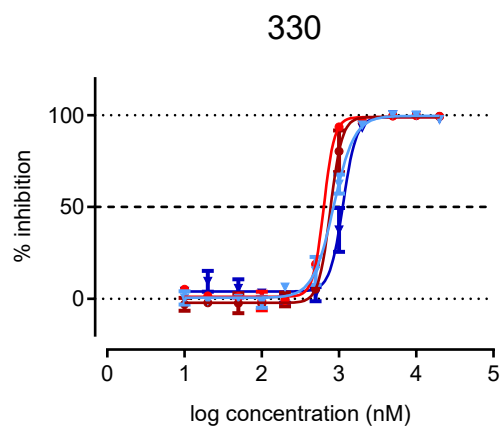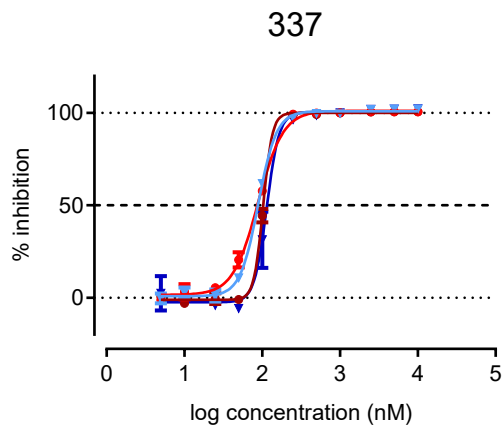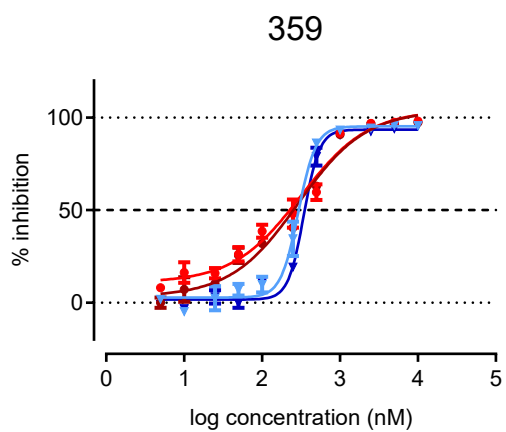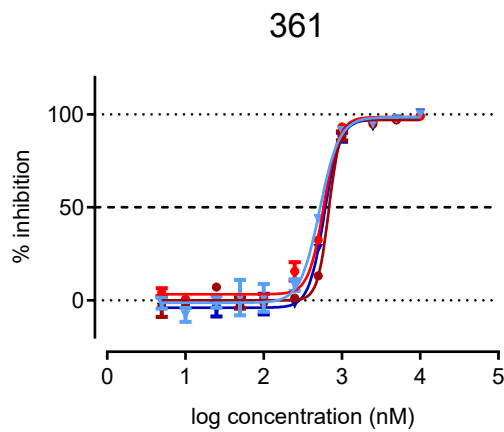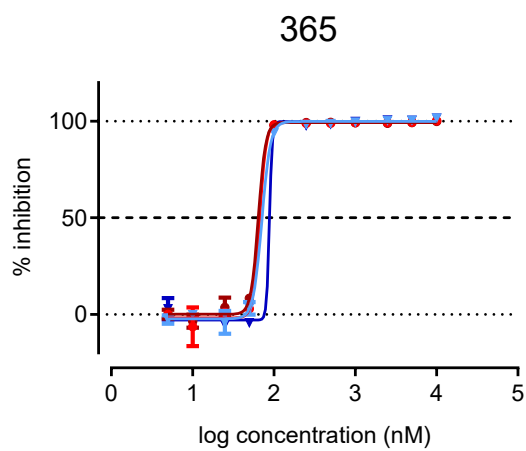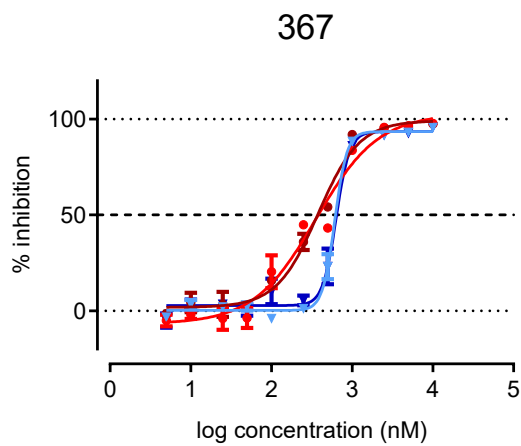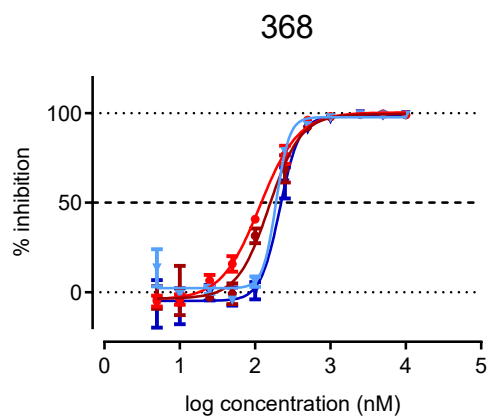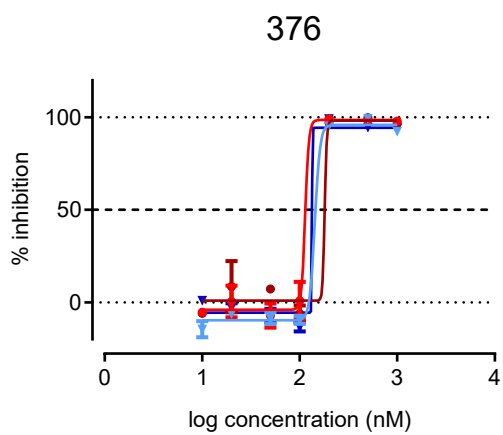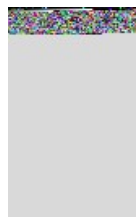



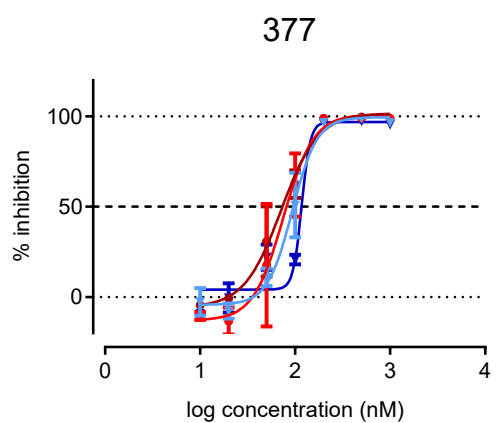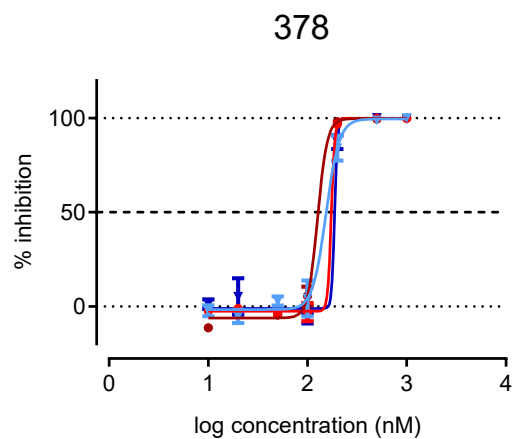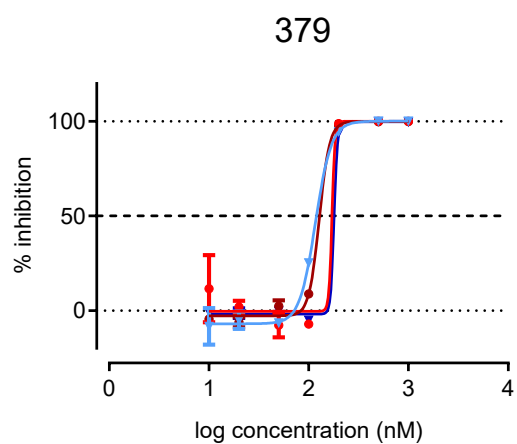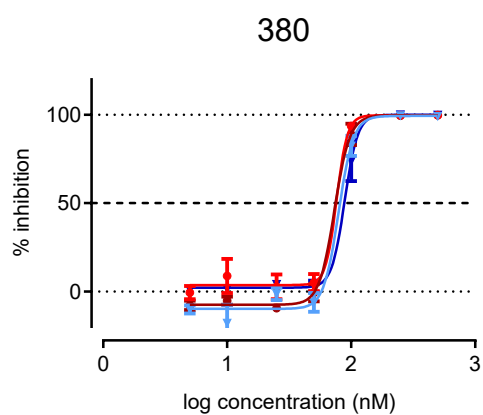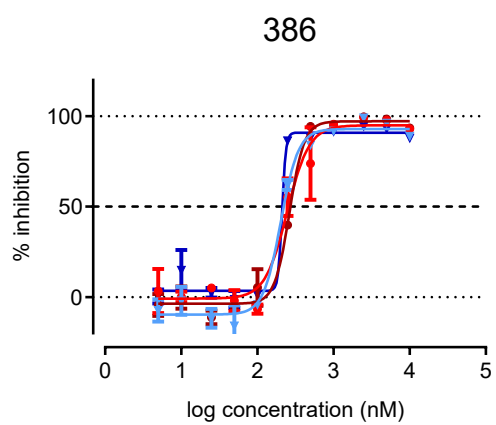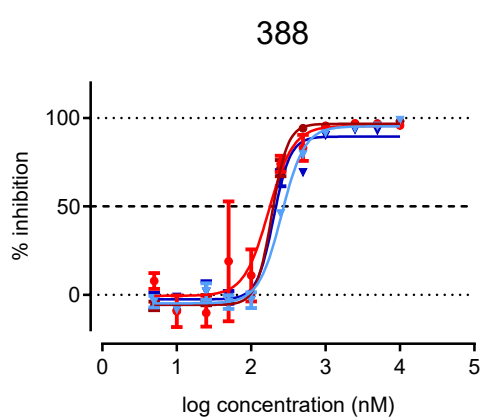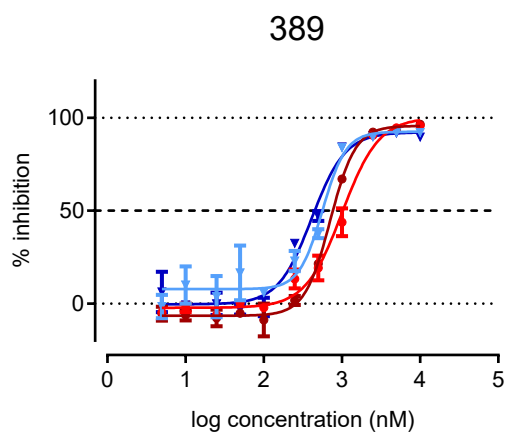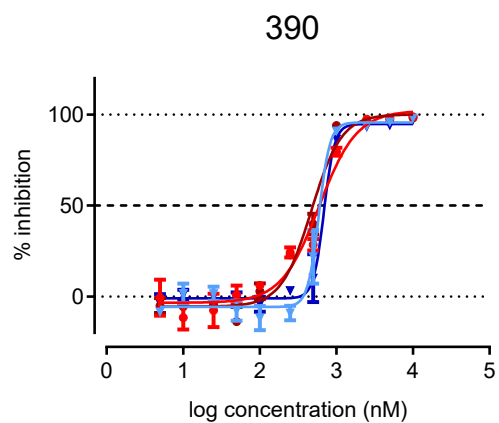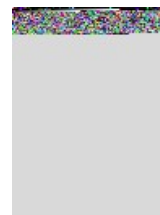



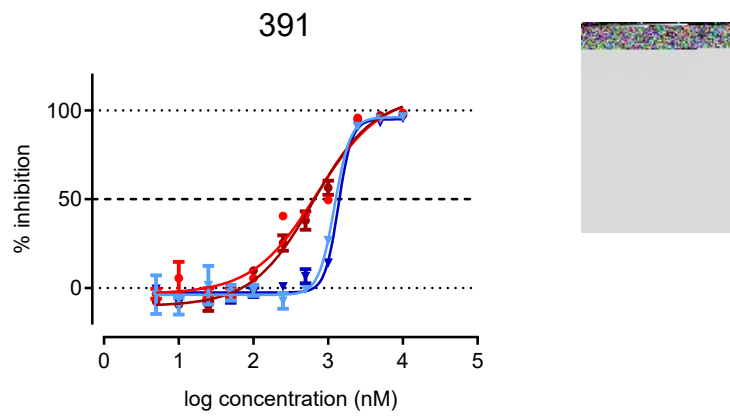

**Figure 1.** Percent inhibition of *P. falciparum* parasites (3D7 and Dd2 strains) by S-MGBs. IC<sub>50</sub> curves calculated through a four-parameter logistic curve fitting in Prism (GraphPad).



#### 4. *In Vitro* Cytotoxicity Assessment Against HEK293 For S-MGBs

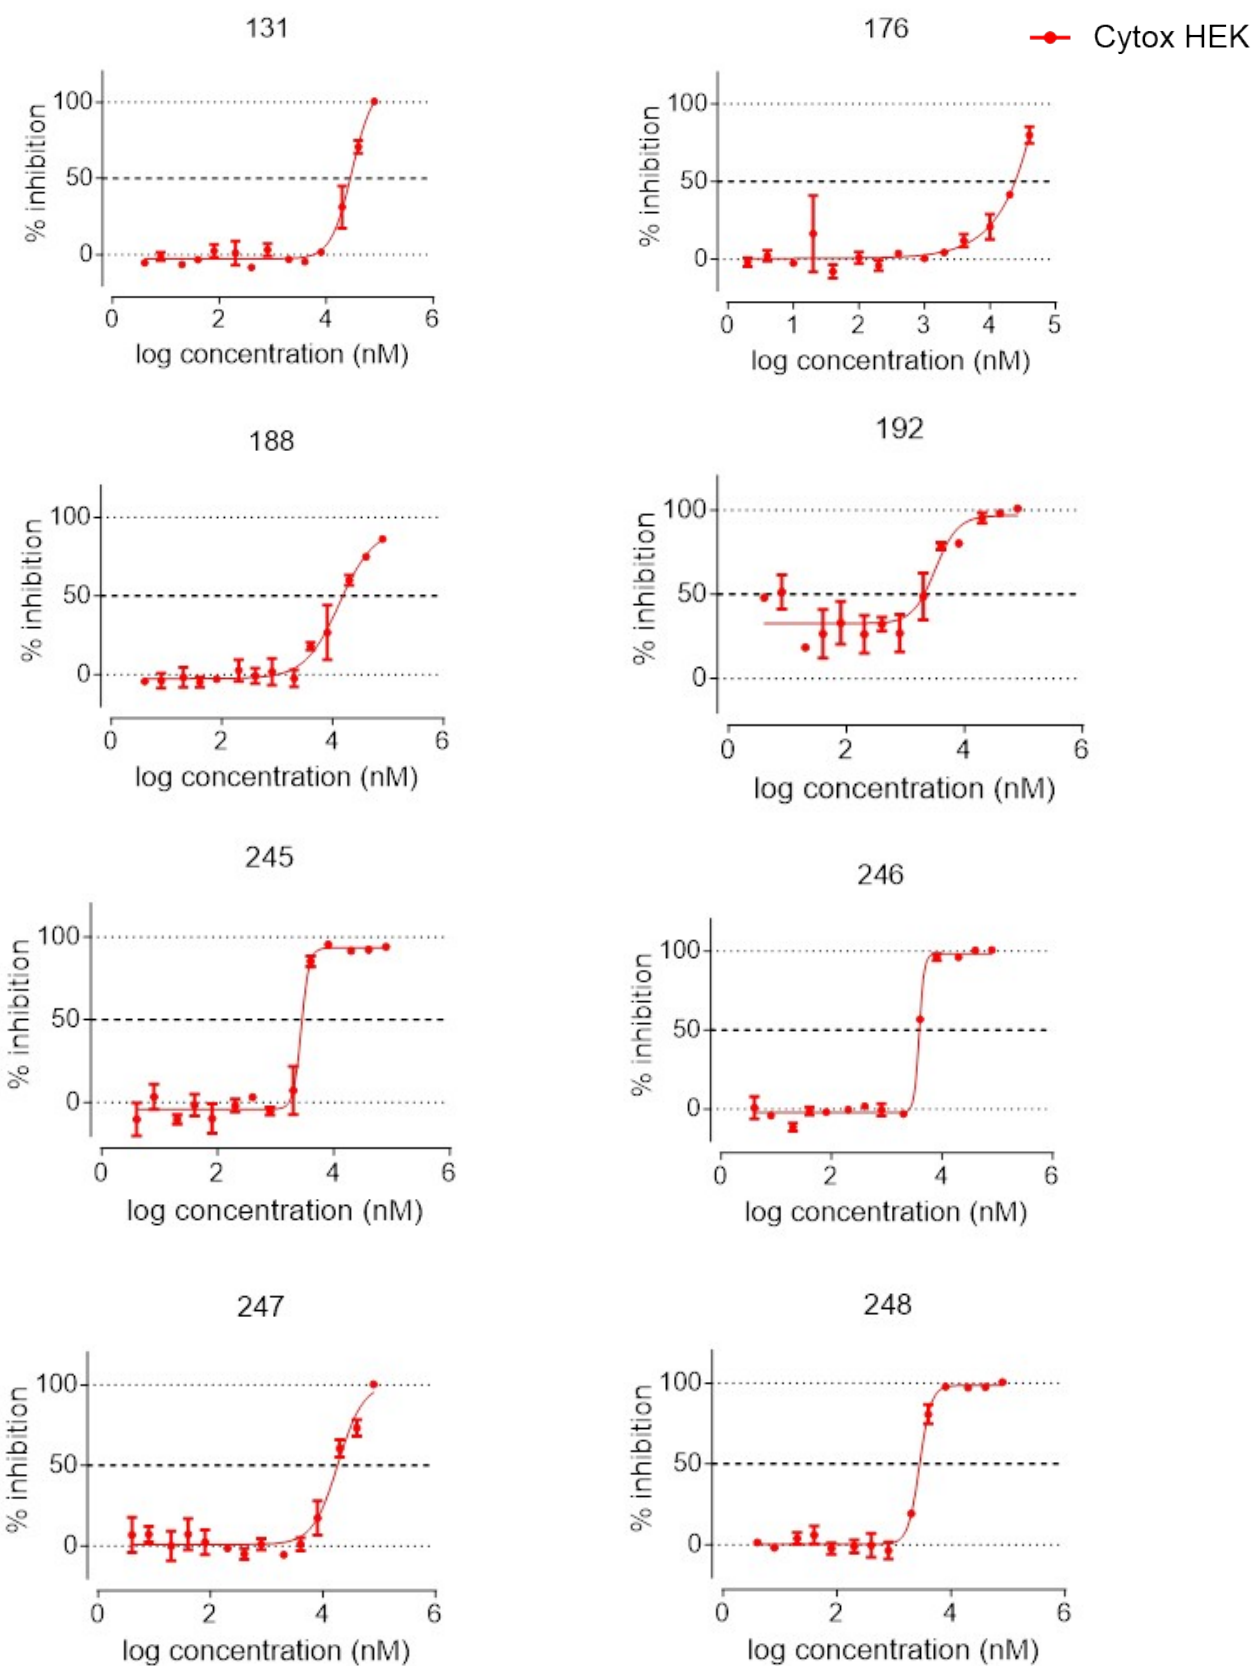



—●— Cytos HEK

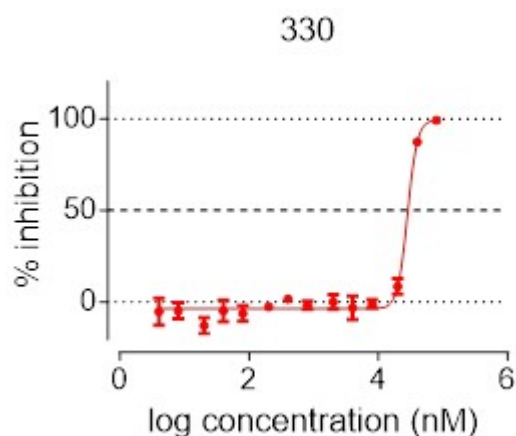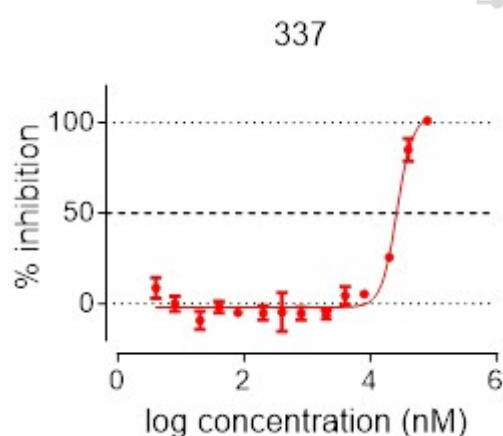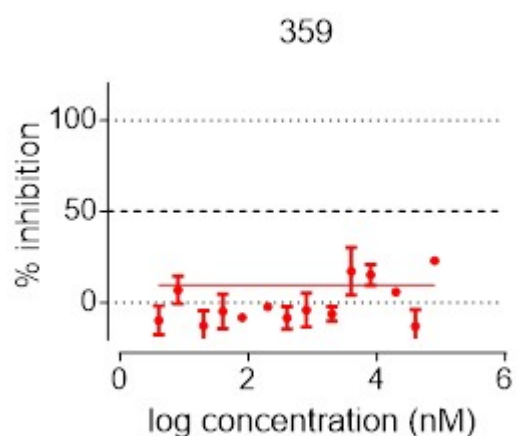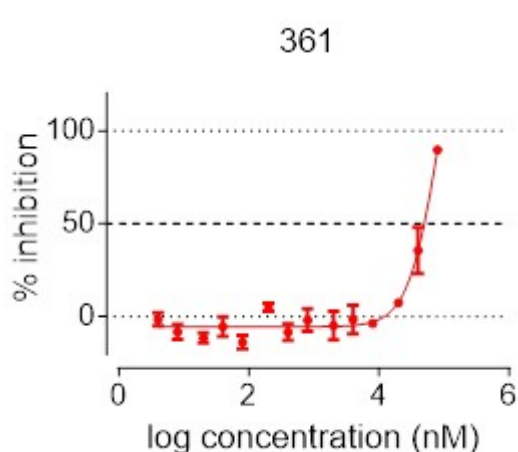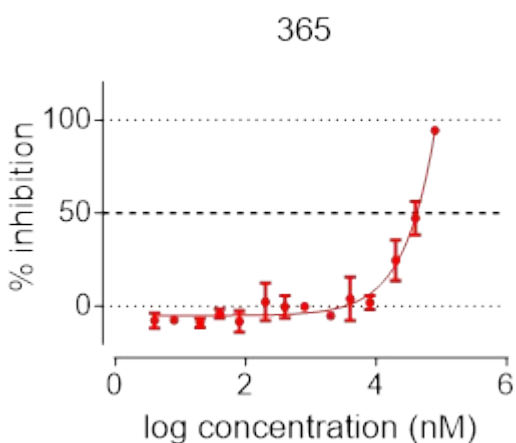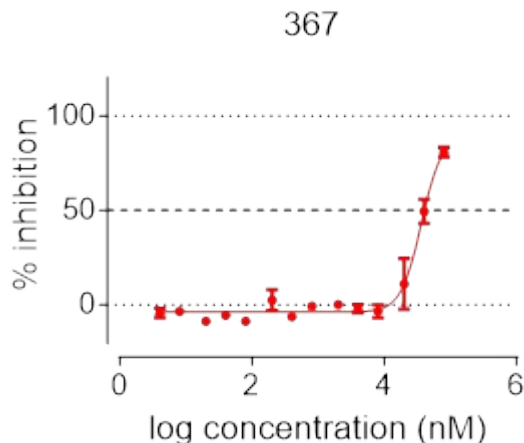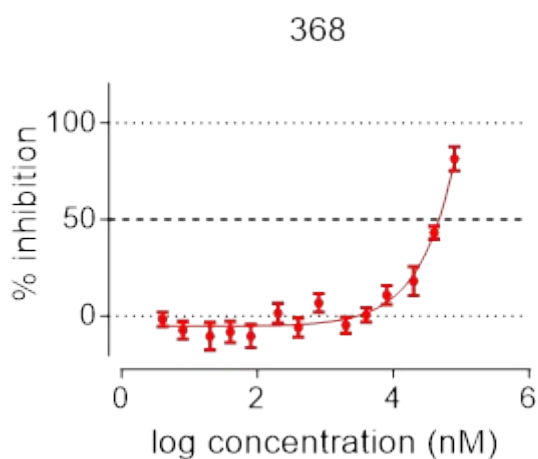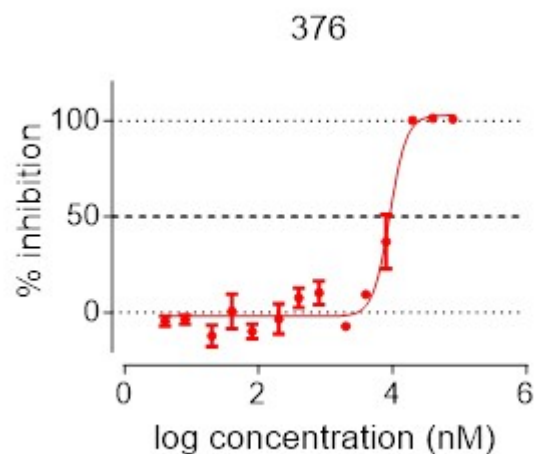



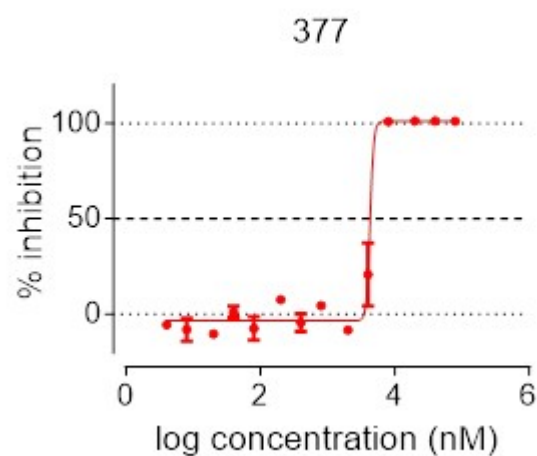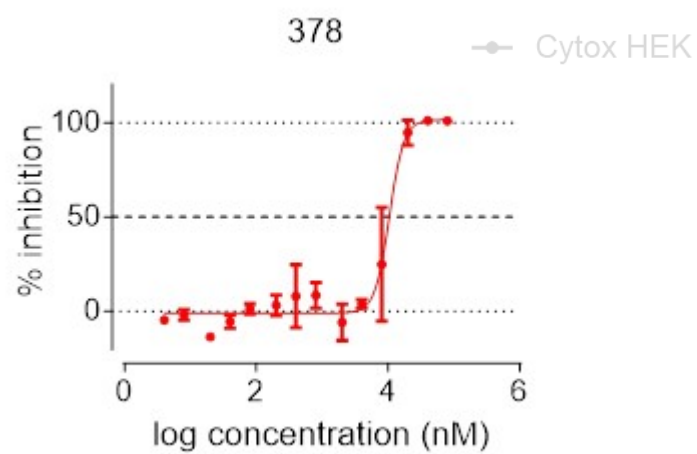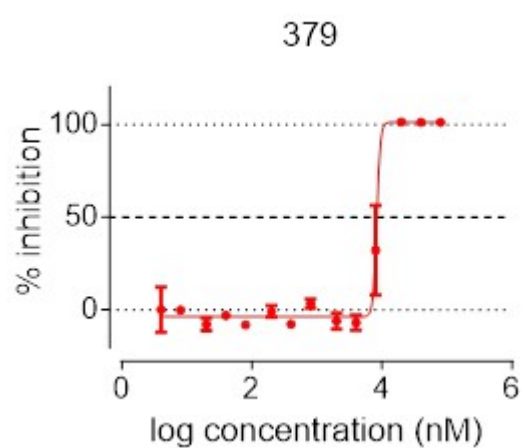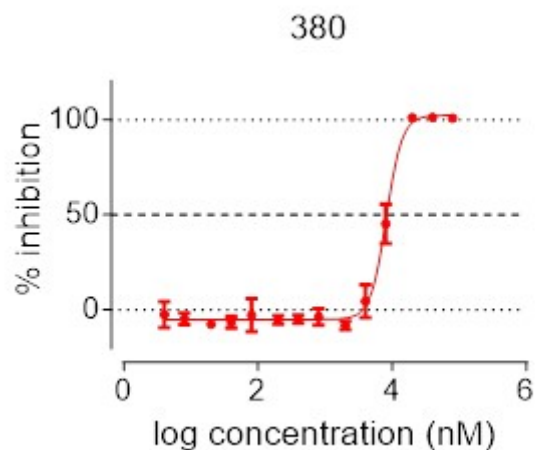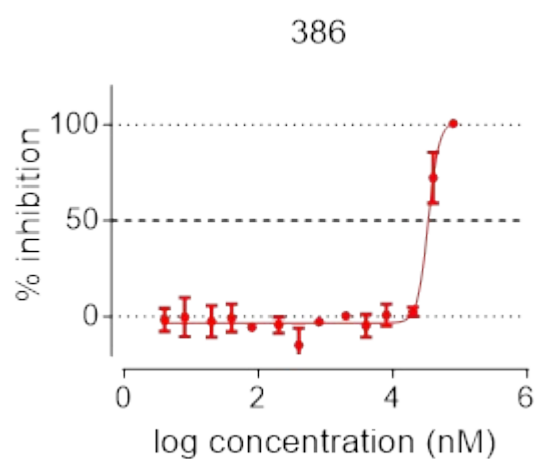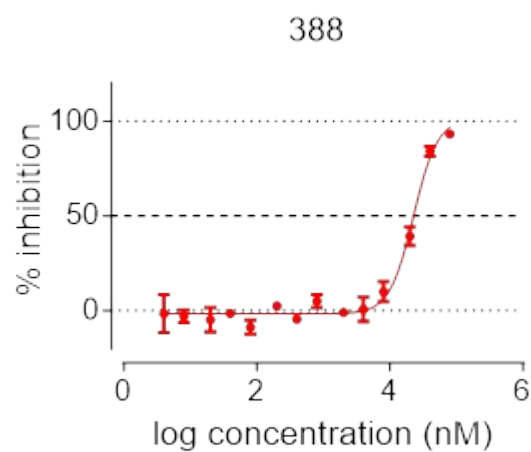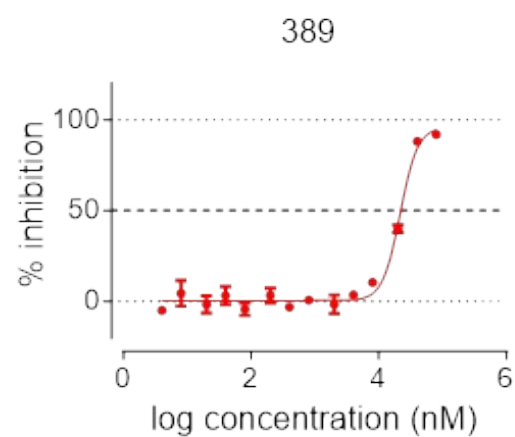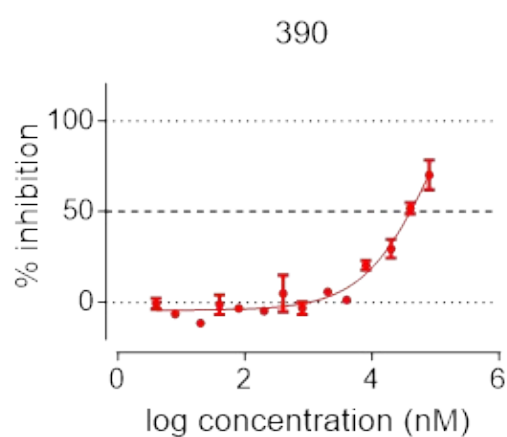



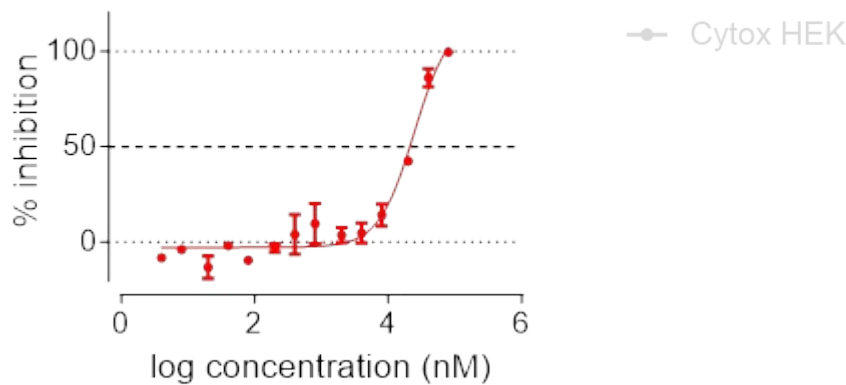

**Figure 2.** Percent inhibition of cell viability of Human Embryonic Kidney cells (HEK293) by S-MGBs. IC<sub>50</sub> curves calculated through a four-parameter logistic curve fitting in Prism (GraphPad).

### 5. *In Vitro* Asexual *P. falciparum* Assays Against 3D7 and Dd2, And Cytotoxicity Assessment Against HEK293 For Control Compounds

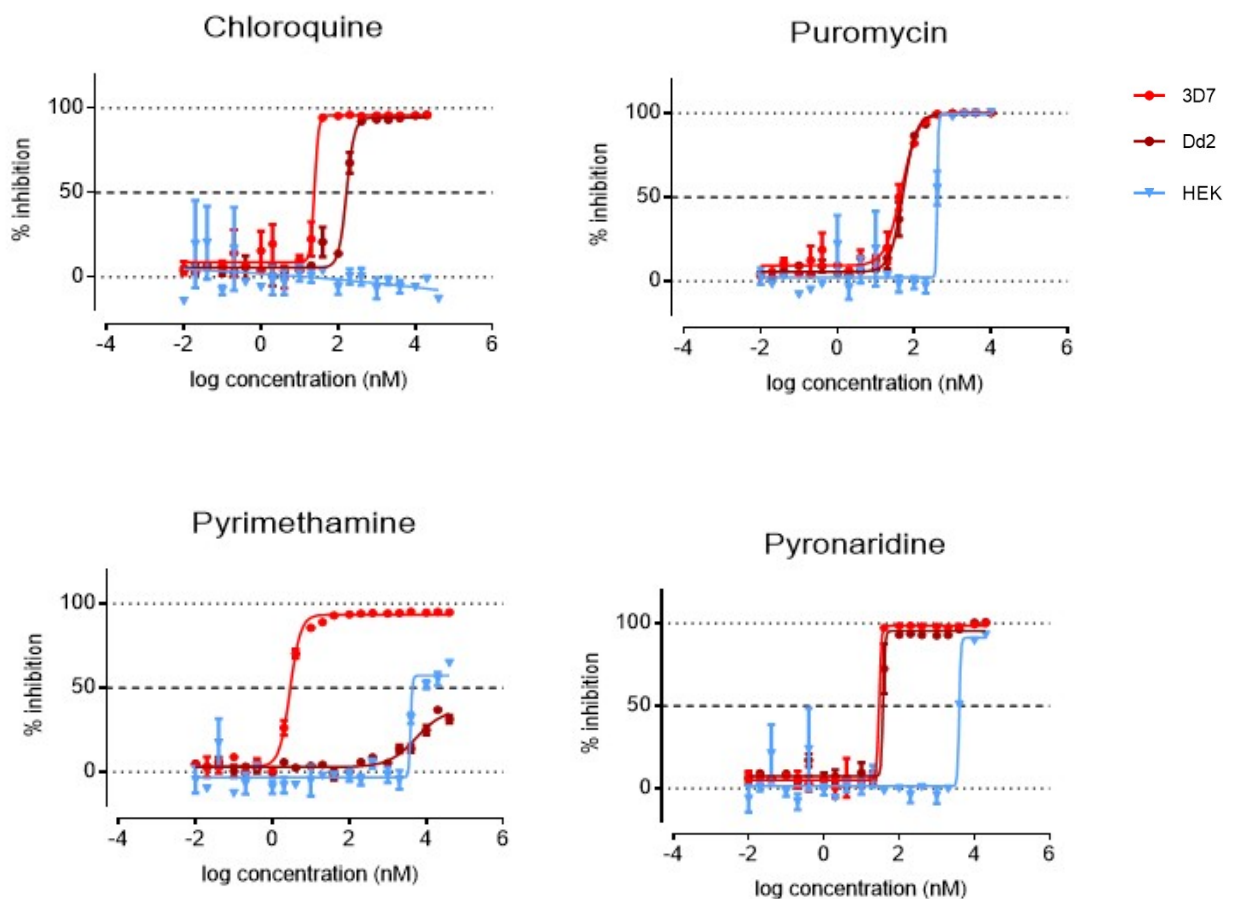

**Figure 3.** Percent inhibition of cell viability of Human Embryonic Kidney cells (HEK293) and Percent inhibition of *P. falciparum* parasites (3D7 and Dd2 strains) by control compounds. IC<sub>50</sub> curves calculated through a four-parameter logistic curve fitting in Prism (GraphPad). by S-MGBs.



## 6. Native Mass Spectrometry

| Species                                   | m/z value   | Calculated mass of neutral species (Da) |
|-------------------------------------------|-------------|-----------------------------------------|
| Single Stranded [SS]                      | 3- : 1214.1 | $(1214.1 \times 3) + 3 = 3645.3$        |
|                                           | 4- : 910.3  | $(910.3 \times 4) + 4 = 3645.2$         |
| Double Stranded [DS]                      | 4- : 1821.7 | $(1821.7 \times 4) + 4 = 7290.8$        |
|                                           | 5- : 1457.2 | $(1457.2 \times 5) + 5 = 7291.0$        |
| *Double Stranded + 2 x S-MGB-365 [DS+2M]* | 4- : 2091.0 | $(2106.0 \times 4) + 4 = 8368.0$        |
|                                           | 5- : 1672.6 | $(1684.6 \times 5) + 5 = 8368.0$        |

**Table S2.** Calculated and measured masses for each species observed in **Figure 4, Panel A** for DNA sequence 5'-CGCATATATGCG-3' **S-MGB-365**.

| Species                                   | m/z value   | Calculated mass of neutral species (Da) |
|-------------------------------------------|-------------|-----------------------------------------|
| Single Stranded [SS]                      | 3- : 1214.1 | $(1214.1 \times 3) + 3 = 3645.3$        |
|                                           | 4- : 910.3  | $(910.3 \times 4) + 4 = 3645.2$         |
| Double Stranded [DS]                      | 4- : 1821.7 | $(1821.7 \times 4) + 4 = 7290.8$        |
|                                           | 5- : 1457.2 | $(1457.2 \times 5) + 5 = 7291.0$        |
| *Double Stranded + 2 x S-MGB-368 [DS+2M]* | 4- : 2106.0 | $(2106.0 \times 4) + 4 = 8428.0$        |
|                                           | 5- : 1684.6 | $(1684.6 \times 5) + 5 = 8428.0$        |

**Table S3.** Calculated and measured masses for each species observed in **Figure 4, Panel B** for DNA sequence 5'-CGCATATATGCG-3' **S-MGB-368**.

| Species                                  | m/z value   | Calculated mass of neutral species (Da) |
|------------------------------------------|-------------|-----------------------------------------|
| Single Stranded [SS]                     | 3- : 1214.1 | $(1214.1 \times 3) + 3 = 3645.3$        |
|                                          | 4- : 910.3  | $(910.3 \times 4) + 4 = 3645.2$         |
| Double Stranded [DS]                     | 4- : 1821.7 | $(1821.7 \times 4) + 4 = 7290.8$        |
|                                          | 5- : 1457.2 | $(1457.2 \times 5) + 5 = 7291.0$        |
| Double Stranded + 1 x S-MGB-359 [DS+1M]  | 5- : 1574.7 | $(1574.7 \times 5) + 5 = 7877.0$        |
| *Double Stranded + 2 x S-MGB-359 [DS+2M] | 4- : 2115.5 | $(2115.5 \times 4) + 4 = 8466.0$        |
|                                          | 5- : 1692.2 | $(1692.2 \times 5) + 5 = 8466.0$        |

**Table S4.** Calculated and measured masses for each species observed in **Figure 4, Panel C** for DNA sequence 5'-CGCATATATGCG-3' **S-MGB-359**.
